# Supplementary material for: Green synthesis of balsam pear-shaped BiVO4/BiPO4 nanocomposite for degradation of organic dye and antibiotic metronidazole
Source: Royal Society of Chemistry journal article supplement (doi:10.1039/c8dt00408k), 2018-01-01
Supplement: c8dt00408k1.pdf [file c8dt00408k1.pdf]

## Green synthesis of balsam pear-shaped BiVO<sub>4</sub>/BiPO<sub>4</sub> nanocomposite for degradation of organic dye and antibiotic metronidazole

Yunhui Yan<sup>a\*</sup>, Tianjun Ni<sup>a,b</sup>, Jinge Du<sup>b,c</sup>, Li Li<sup>b</sup>, Shuai Fu<sup>b</sup>, Kun Li<sup>a</sup>, Jianguo Zhou<sup>b,\*</sup>

<sup>a</sup> *Key Laboratory of Medical Molecular Probes, School of Basic Medical Sciences, Xinxiang Medical University, Xinxiang, Henan 453003 China*

<sup>b</sup> *School of Environment, Henan Normal University, Henan Engineering Laboratory of Environmental Functional Materials and Pollution Control, Xinxiang, Henan 453007, PR China*

<sup>c</sup> *Sanquan College, Xinxiang Medical University, Xinxiang, Henan 453003, PR China*

*Synthesis of BiPO<sub>4</sub> and BiVO<sub>4</sub>:* The BiPO<sub>4</sub> and BiVO<sub>4</sub> samples were synthesized through a precipitation-hydrothermal method. Briefly, 2.5 mmol Bi(NO<sub>3</sub>)<sub>3</sub>·5H<sub>2</sub>O was dispersed in 5 mL of ethylene glycol (EG), and sonicated until completely dissolved. After that, 2.5 mmol NaH<sub>2</sub>PO<sub>4</sub>·2H<sub>2</sub>O (or NH<sub>4</sub>VO<sub>3</sub>) was completely dissolved in 45 mL deionized water, which was added dropwise to the above Bi-EG solution during stirring process at room temperature. Finally, the obtained suspension was poured into a 100 mL Teflon-lined stainless steel autoclave, and maintained at 180 °C for 12h. The autoclave was then cooled down to room temperature naturally. The product was collected, washed with deionized water and dried in vacuum at 60 °C for 10 h.

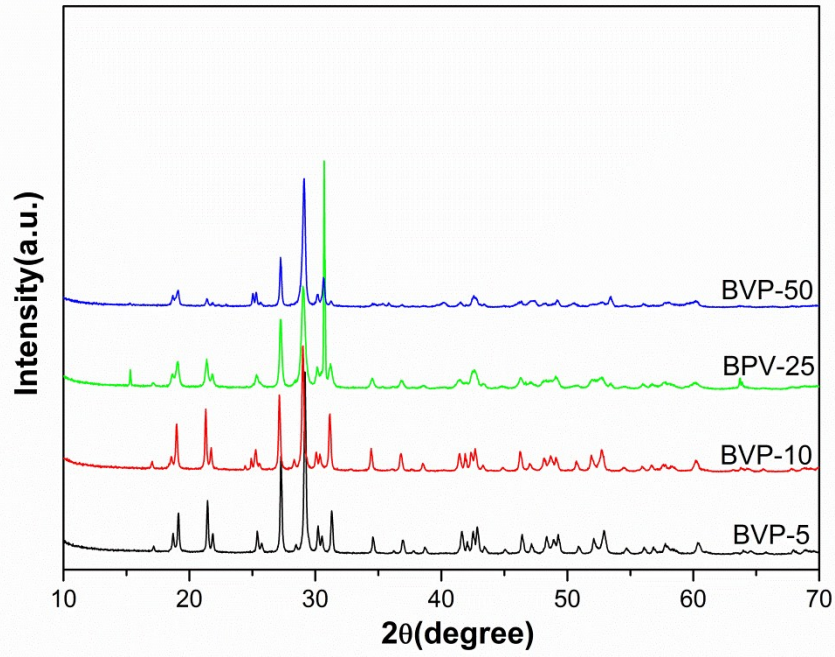

Fig.S1 XRD patterns of the BiVO<sub>4</sub>/BiPO<sub>4</sub> composites with different molar ratios of BiVO<sub>4</sub> to BiPO<sub>4</sub>.

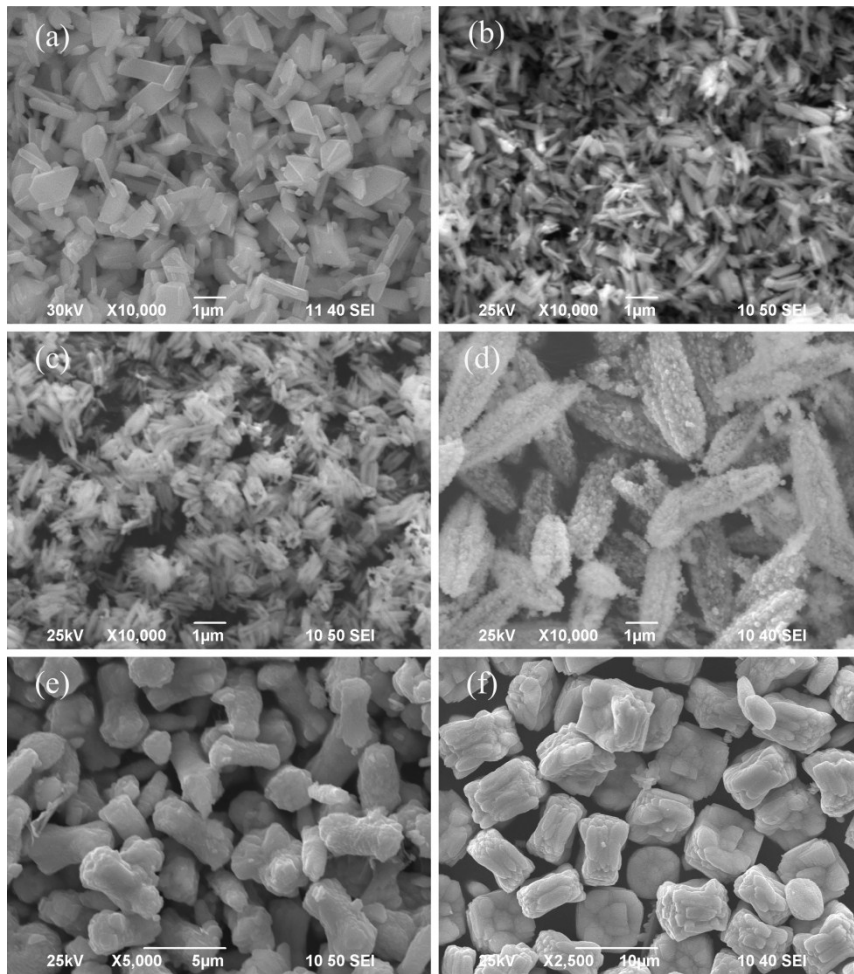

Fig.S2 SEM image of (a)  $\text{BiPO}_4$ , (b) BVP-5, (c) BVP-10, (d) BVP-25, (e) BVP-50 and (f)  $\text{BiVO}_4$ .
